# Supplementary material for: Redox electrolyte mediated performance enhancement in aqueous zinc ion hybrid supercapacitors composed of spinel BaFe2O4 and cubic Cu2O
Source: Royal Society of Chemistry journal article supplement (doi:10.1039/d4tc00262h), 2024-01-01
Supplement: d4tc00262h1.pdf [file d4tc00262h1.pdf]

## SUPPLEMENTARY MATERIALS

Sevda Yetiman<sup>a,h</sup>, Fatma Kilic Dokan<sup>b,\*</sup>, M. Serdar Onses<sup>a,c</sup>, Erkan Yilmaz<sup>a,d,e</sup>, Ahmet Turan Ozdemir<sup>f</sup>, Ertugrul Sahmetlioglu<sup>a,g\*</sup>

<sup>a</sup>ERNAM-Erciyes University Nanotechnology Application and Research Center, Kayseri, 8039, Türkiye

<sup>b</sup>Department of Chemistry and Chemical Processing Technologies, Mustafa Çıkrıkcıoğlu Vocational School, Kayseri University, Kayseri, Türkiye

<sup>c</sup>Department of Materials Science and Engineering, Faculty of Engineering, Erciyes University, Kayseri, 38039, Türkiye

<sup>d</sup>Technology Research & Application Center (TAUM), Erciyes University, Kayseri, 8039, Türkiye

<sup>e</sup>Department of Analytical Chemistry, Faculty of Pharmacy, Erciyes University, Kayseri, Türkiye

<sup>f</sup>Faculty of Engineering, Electric and Electronics Department, Erciyes University, Kayseri, 38039, Türkiye

<sup>g</sup>Department of Basic Sciences of Engineering, Kayseri University, Kayseri, 38039, Türkiye

<sup>h</sup>Erciyes University Graduate School of Natural and Applied Sciences, Department of Nanoscience and Nanotechnology, Erciyes University, Kayseri, 38039, Türkiye

\*Corresponding authors ; fatmakilic@kayseri.edu.tr, [sahmetlioglu@erciyes.edu.tr](mailto:sahmetlioglu@erciyes.edu.tr)

**Table S1**<sup>†</sup>. Crystallite size analysis data for Debye Scherrer model

| <b>Cu<sub>2</sub>O</b>                               |               |           |                |                        |                |                       |                               |
|------------------------------------------------------|---------------|-----------|----------------|------------------------|----------------|-----------------------|-------------------------------|
| <b>K</b>                                             | <b>λ (nm)</b> | <b>2θ</b> | <b>FWHM(β)</b> | <b>Theta (radians)</b> | <b>Cos (θ)</b> | <b>FHWM (radians)</b> | <b>Crystallite size D(nm)</b> |
| 0,94                                                 | 0,15418       | 29,74     | 0,152          | 0,25953046             | 0,966510581    | 0,002654471           | 56,48995834                   |
| 0,94                                                 | 0,15418       | 36,60     | 0,187          | 0,319395253            | 0,949425478    | 0,003266907           | 46,72595675                   |
| 0,94                                                 | 0,15418       | 42,51     | 0,209          | 0,370969733            | 0,931976237    | 0,003647738           | 42,63118475                   |
| 0,94                                                 | 0,15418       | 61,60     | 0,289          | 0,53756141             | 0,858959897    | 0,005044002           | 33,4508992                    |
| 0,94                                                 | 0,15418       | 73,76     | 0,300          | 0,643677428            | 0,799894196    | 0,005235988           | 34,6038744                    |
| 0,94                                                 | 0,15418       | 77,62     | 0,370          | 0,677362283            | 0,77922859     | 0,006462082           | 28,78184179                   |
| <b>40,44</b>                                         |               |           |                |                        |                |                       |                               |
| <b>BaFe<sub>2</sub>O<sub>4</sub></b>                 |               |           |                |                        |                |                       |                               |
| <b>K</b>                                             | <b>λ (nm)</b> | <b>2θ</b> | <b>FWHM(β)</b> | <b>Theta (radians)</b> | <b>Cos (θ)</b> | <b>FWHM (radians)</b> | <b>D(nm)</b>                  |
| 0,94                                                 | 0,15418       | 23,99     | 0,183          | 0,209352244            | 0,978165741    | 0,003192207           | 46,41436079                   |
| 0,94                                                 | 0,15418       | 32,63     | 0,960          | 0,284750467            | 0,959731781    | 0,016755161           | 9,012751938                   |
| 0,94                                                 | 0,15418       | 42,09     | 0,210          | 0,367304541            | 0,933298677    | 0,003665191           | 42,36806038                   |
| 0,94                                                 | 0,15418       | 43,06     | 0,620          | 0,375769388            | 0,930225541    | 0,010821041           | 14,39788095                   |
| 0,94                                                 | 0,15418       | 44,97     | 0,220          | 0,392437282            | 0,923979687    | 0,003839724           | 40,8501281                    |
| 0,94                                                 | 0,15418       | 46,86     | 0,360          | 0,408930644            | 0,917546554    | 0,006283185           | 25,13899538                   |
| <b>29,69</b>                                         |               |           |                |                        |                |                       |                               |
| <b>BaFe<sub>2</sub>O<sub>4</sub>@Cu<sub>2</sub>O</b> |               |           |                |                        |                |                       |                               |
| <b>K</b>                                             | <b>λ (nm)</b> | <b>2θ</b> | <b>FWHM(β)</b> | <b>Theta (radians)</b> | <b>Cos (θ)</b> | <b>FWHM (radians)</b> | <b>D(nm)</b>                  |
| 0,94                                                 | 0,15418       | 23,86     | 0,100          | 0,20821778             | 0,978400883    | 0,001745329           | 84,87146358                   |
| 0,94                                                 | 0,15418       | 34,60     | 1,900          | 0,301941961            | 0,9547608      | 0,033161256           | 4,577521016                   |
| 0,94                                                 | 0,15418       | 42,45     | 0,160          | 0,370446134            | 0,932165924    | 0,002792527           | 55,6756533                    |
| 0,94                                                 | 0,15418       | 44,84     | 0,180          | 0,391302818            | 0,924412959    | 0,003141593           | 49,90453317                   |
| 0,94                                                 | 0,15418       | 46,21     | 1,020          | 0,403258324            | 0,919787256    | 0,017802358           | 8,850972016                   |
| 0,94                                                 | 0,15418       | 46,80     | 1,040          | 0,408407045            | 0,917754626    | 0,018151424           | 8,699987045                   |
| 0,94                                                 | 0,15418       | 29,61     | 0,165          | 0,258395996            | 0,966801093    | 0,002886775           | 51,92851334                   |
| 0,94                                                 | 0,15418       | 36,68     | 0,750          | 0,320093385            | 0,949206038    | 0,013089969           | 11,66424872                   |
| 0,94                                                 | 0,15418       | 42,41     | 1,020          | 0,370053435            | 0,932308021    | 0,017802358           | 8,732104707                   |
| 0,94                                                 | 0,15418       | 61,54     | 0,420          | 0,537037811            | 0,859227884    | 0,007330383           | 23,01022548                   |
| 0,94                                                 | 0,15418       | 73,73     | 0,380          | 0,643415629            | 0,800051285    | 0,006632251           | 27,31348419                   |
| <b>30,47</b>                                         |               |           |                |                        |                |                       |                               |

**Table S2<sup>†</sup>.** Areal capacitance results of the materials

| Areal Capacitance (mF/cm <sup>2</sup> )            |      |       |      |     |     |     |
|----------------------------------------------------|------|-------|------|-----|-----|-----|
| Current Density (mA)                               | 0.85 | 2.125 | 4.25 | 8.5 | 1.7 | 3.4 |
| Cu <sub>2</sub> O                                  | 390  | 328   | 242  | 192 | 133 | -   |
| BaFe <sub>2</sub> O <sub>4</sub>                   | 503  | 483   | 401  | 262 | 210 | 167 |
| Cu <sub>2</sub> O@BaFe <sub>2</sub> O <sub>4</sub> | 682  | 603   | 545  | 210 | 167 | 231 |

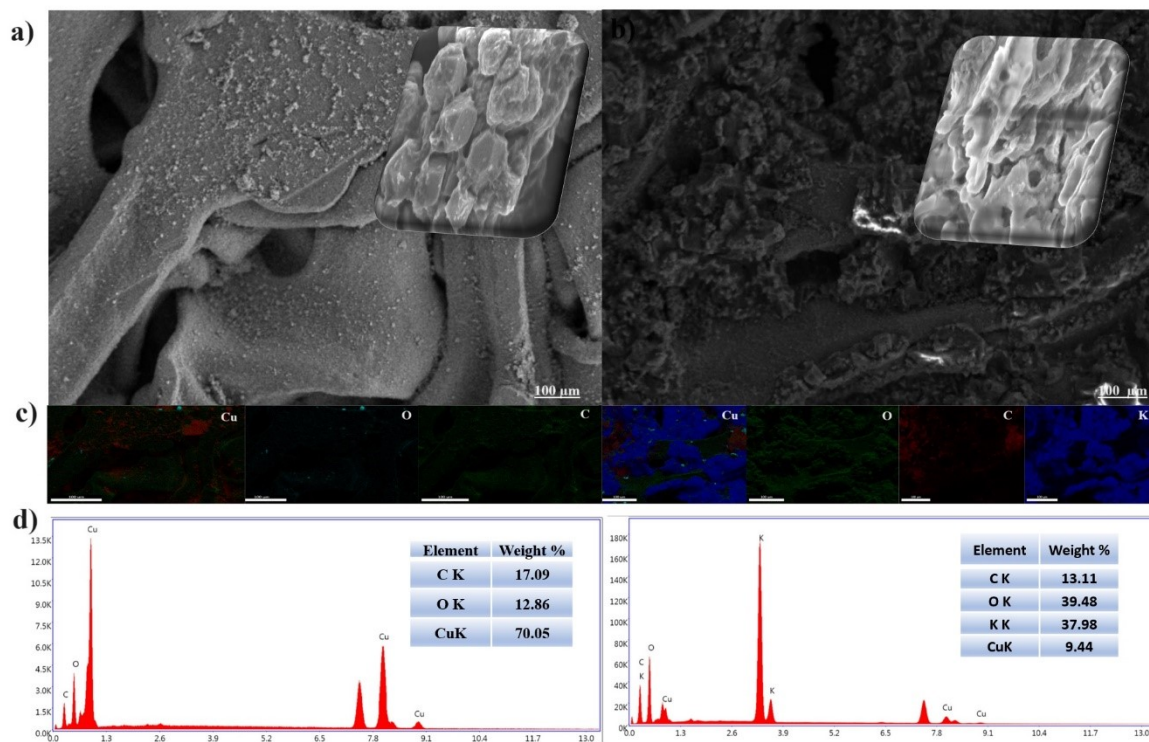

**Figure S1.** FESEM images of  $\text{Cu}_2\text{O}$  electrode (a) before cycling and (b) after cycling stability test. (c) Individual elemental mapping image of Cu, O, C, and K (after cyclic), (d) spectra of EDS mapping.

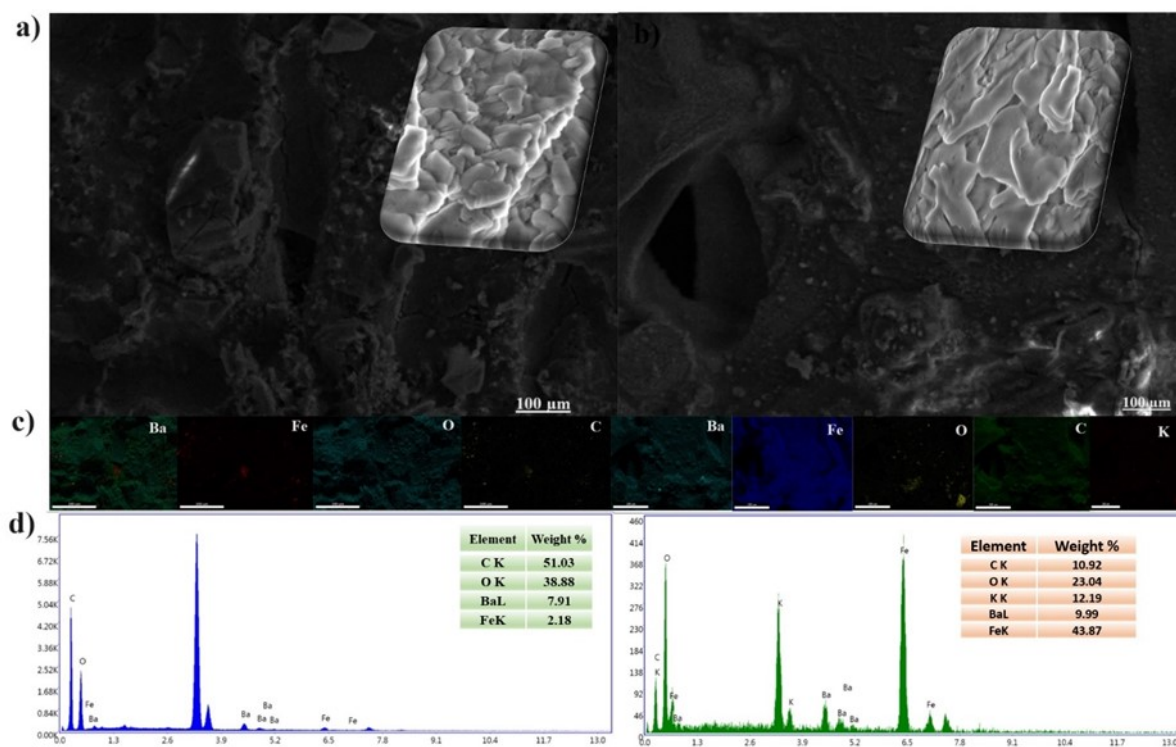

**Figure S2.** FESEM images of BaFe<sub>2</sub>O electrode (a) before cycling and (b) after cycling stability test. (c) Individual elemental mapping image of Ba, Fe, O, C, and K ( after cyclic), (d) spectra of EDS mapping.

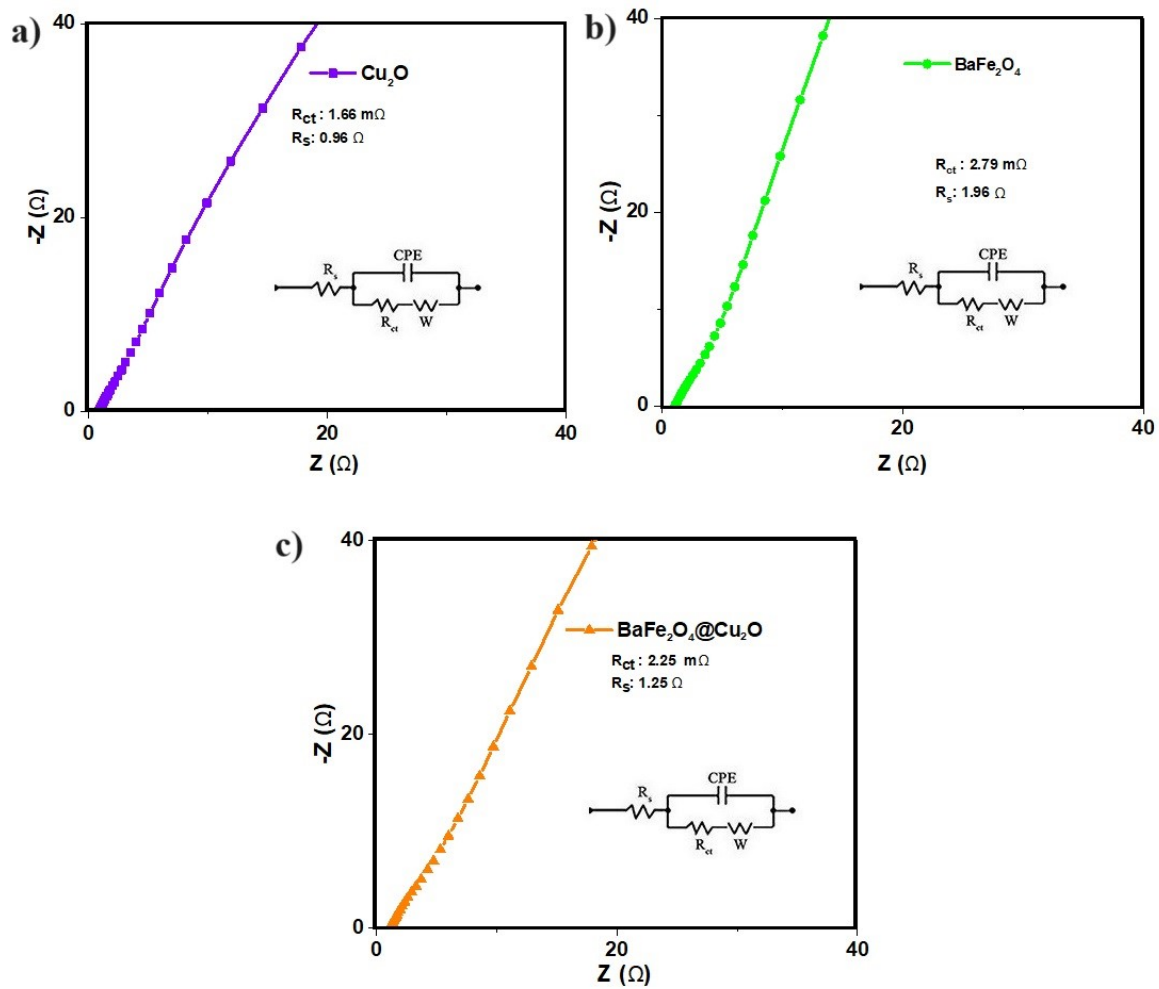

**Figure S3.** Electrochemical impedance spectra of electrodes at low-frequency range in 2 M KOH solution after cyclic test (Inside corresponding equivalent circuit for modeling the measured impedance spectroscopy).

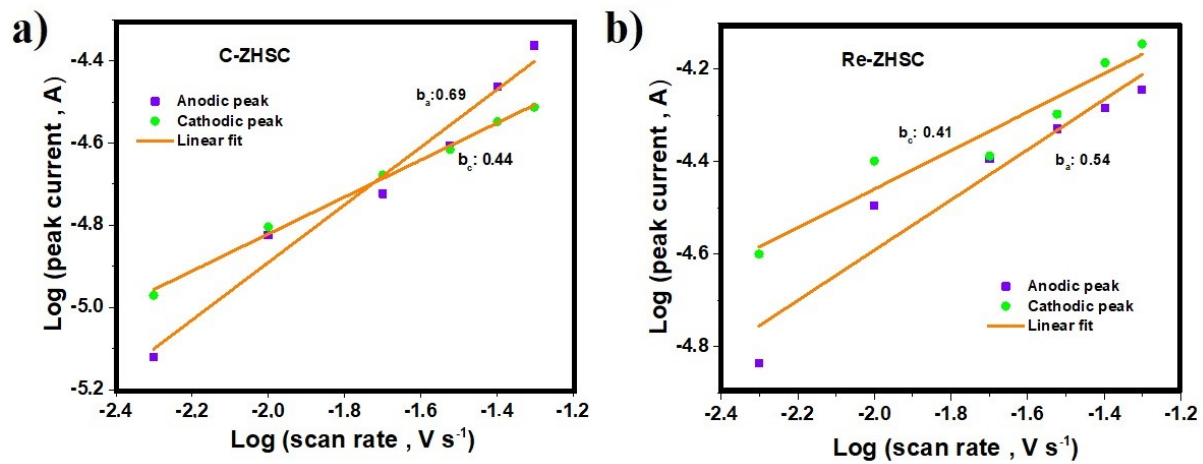

**Figure S4.** The logarithm of peak currents vs the logarithm of scan rates.

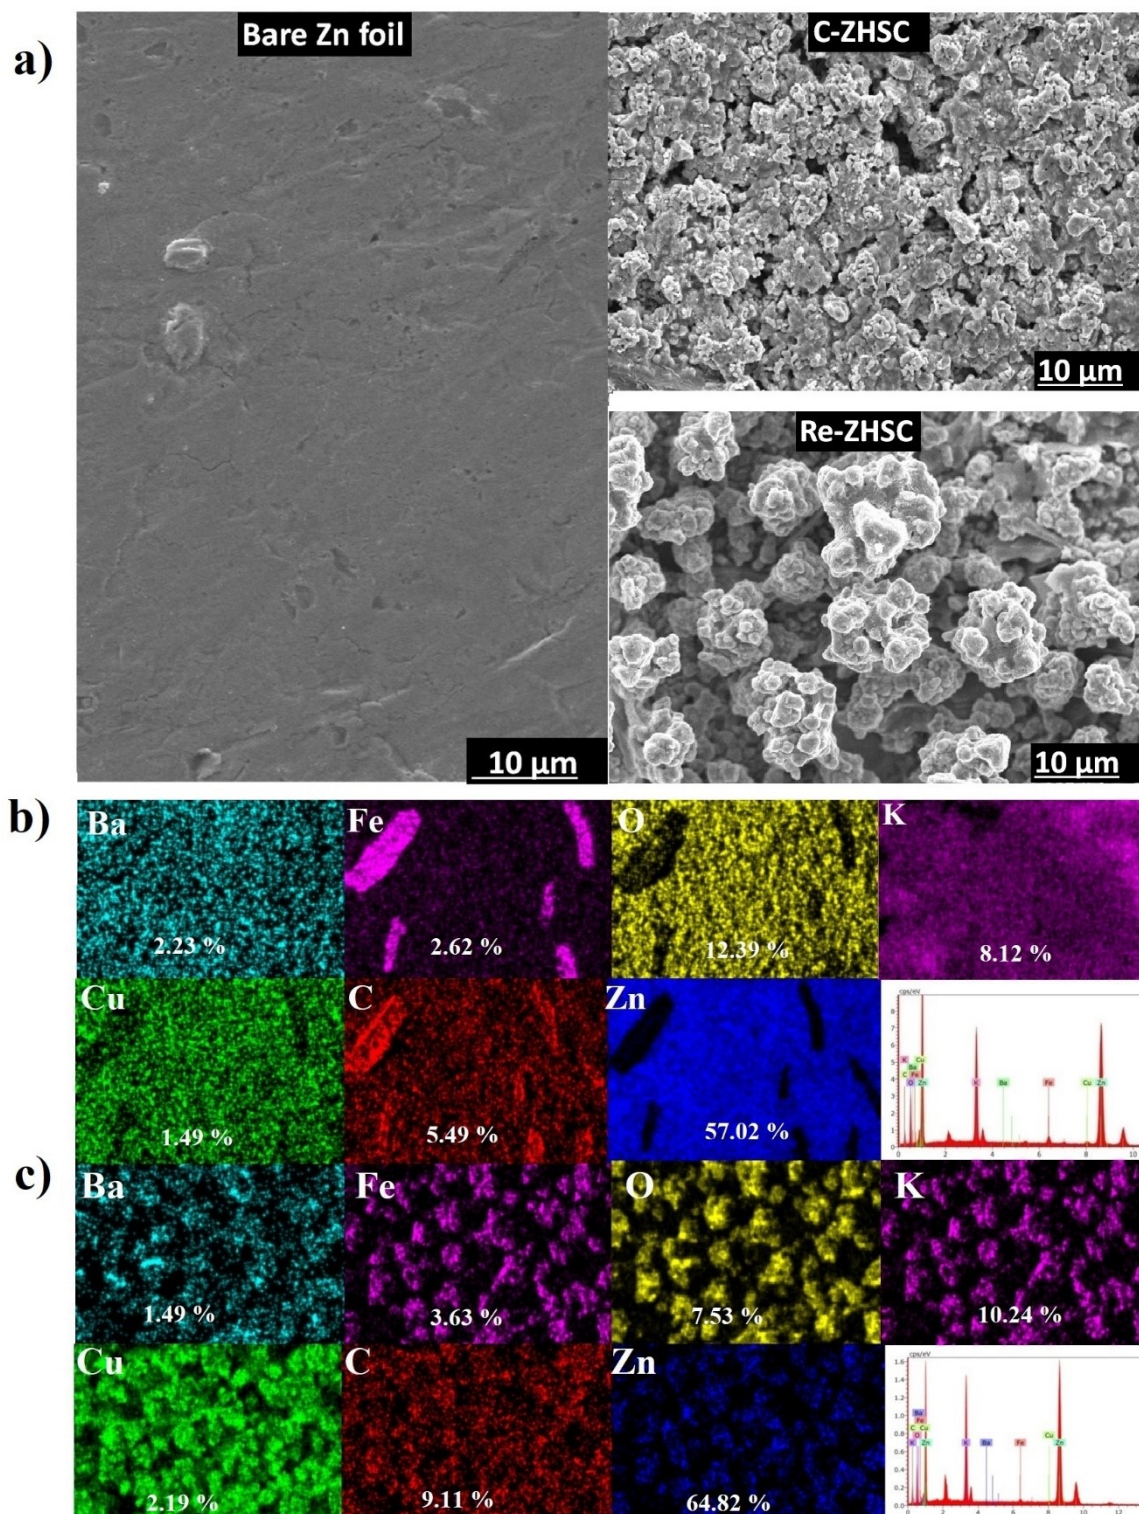

**Figure S5.** Scanning electron microscopy images of the samples (a) bare Zn foil, C-ZHSC and Re-ZHSC. Individual elemental mapping image of Ba, Fe, O, K, Cu, C, Zn, and spectra of EDS mapping of (b) C-ZHSC and, (c) Re-ZHSC.
